# Epstein-Barr virus latent membrane protein 2A suppresses the expression of HER2 via a pathway involving TWIST and YB-1 in Epstein-Barr virus-associated gastric carcinomas

Yi-wang Zhang<sup>1</sup>, Xiao-xiao Zhao<sup>1</sup>, Cui Tan<sup>4</sup>, Zhi-gang Zhang<sup>1</sup>, Ye Jiang<sup>1</sup>, Jian-ning Chen<sup>1</sup>, Hong-bo Wei<sup>2</sup>, Ling Xue<sup>3</sup>, Hai-gang Li<sup>4</sup>, Hong Du<sup>5</sup> and Chun-kui Shao<sup>1</sup>

<sup>1</sup> Department of Pathology, The Third Affiliated Hospital, Sun Yat-sen University, Guangzhou, Guangdong Province, China

<sup>2</sup> Department of Gastrointestinal Surgery, The Third Affiliated Hospital, Sun Yat-sen University, Guangzhou, Guangdong Province, China

<sup>3</sup> Department of Pathology, The First Affiliated Hospital, Sun Yat-sen University, Zhongshan Guangzhou, Guangdong Province, China

<sup>4</sup> Department of Pathology, Sun Yat-sen Memorial Hospital, Sun Yat-sen University, Guangzhou, Guangdong Province, China

<sup>5</sup> Department of Pathology, Guangzhou First Municipal People's Hospital, Guangzhou, Guangdong Province, China

Correspondence to: Chun-kui Shao, email: chunkuishao2011@163.com

Keywords: EBVaGC; HER2; LMP2A; TWIST; YB-1

Received: August 20, 2014

Accepted: November 06, 2014

Published: November 06, 2014

This is an open-access article distributed under the terms of the Creative Commons Attribution License, which permits unrestricted use, distribution, and reproduction in any medium, provided the original author and source are credited.

## ABSTRACT

To explore HER2 expression in Epstein-Barr virus-associated gastric carcinoma (EBVaGC) and the possible mechanisms causing down-regulation of HER2 expression in EBVaGC, we first evaluated HER2 and LMP2A expression on a clinicopathological-features matched cohort including 78 EBVaGC and 216 EBV-negative gastric carcinoma (EBVnGC) cases by immunohistochemistry. Cases with high HER2 expression in EBVaGC were significantly less than in EBVnGC (5.1% versus 23.7%;  $p < 0.001$ ), and none of the 34 LMP2A+ EBVaGC showed high HER2 expression. Further, overexpressing LMP2A in EBV-negative SGC7901 cells significantly decreased HER2, TWIST and YB-1 mRNA by  $36.1\% \pm 8.1\%$ ,  $87.6\% \pm 14.0\%$  and  $83.8\% \pm 5.7\%$ , and protein by 44%, 57% and 49%, respectively. Additionally, the nucleus/cytoplasm ratios of TWIST and YB-1 were also decreased by 85% and 80%, respectively. Silencing LMP2A by siRNA in EBV-positive SNU719 cells for 48 h significantly increased HER2, TWIST and YB-1 mRNA to  $276.7\% \pm 14.6\%$ ,  $1284.8\% \pm 38.2\%$  and  $332.0\% \pm 15.5\%$  and protein to 212%, 457% and 232%, respectively. The nucleus/cytoplasm ratios of TWIST and YB-1 were up-regulated by 4.00- and 3.57-fold, respectively, following LMP2A down-regulation. Moreover, LMP2A+/HER2<sup>low</sup> EBVaGC cases presented the best overall survival compared with LMP2A-/HER2<sup>low</sup> and LMP2A-/HER2<sup>high</sup> cases ( $p = 0.003$ , log-rank test). These results suggest that LMP2A may suppress the HER2 expression through the TWIST/YB-1 axis in EBVaGC.

## INTRODUCTION

EBV is a ubiquitous human herpes virus that causes a life-long asymptomatic persistent infection in more than 95% of the human population [1]. EBV is thought to be closely associated with the development of some lymphoid neoplasms, nasopharyngeal carcinoma (NPC) and EBVaGC [2,3]. EBVaGC is defined as the presence of EBV in gastric carcinoma cells by EBV-encoded

RNA (EBER) *in situ* hybridization [4,5]. EBVaGC comprise approximately 10% of all gastric carcinomas worldwide with a frequency ranging from 1.3% to 20.1% in different countries [6,7]. Our previous study suggested that the proportion of EBVaGC in gastric carcinoma in Guangzhou, southern China, where NPC is endemic, was 6.7% (45/676) [8]. EBVaGC has several distinct clinicopathological features, such as being highly associated with the male gender and younger individuals,

presenting generally diffuse-type histology and frequently occurring in the gastric cardia and body [5,9]. Previous studies have not reached a consensus on the prognosis for EBVaGC. Camargo MC *et al.* have reported that EBVaGC exhibited a significantly longer survival time compared with EBVnGC [10,11], while van Beek *et al.* and Huang SC *et al.* observed no difference in overall survival between EBVaGC and EBVnGC [12,13].

EBV persists in hosts in a latency cycle and constitutively expresses a limited set of viral gene products, the so-called latent products, which are composed of six EBV nuclear antigens (EBNAs 1, 2, 3A, 3B, 3C and EBNA-LP), three latent membrane proteins (LMPs 1, 2A and 2B), two EBV-encoded small non-coding RNAs (EBERs 1 and 2) and the BamHI A rightward transcripts (BARTs). Depending on the expression of different combinations of the latent products, three latency patterns have been classified [2,4]. Latency I is limited to only EBERs, BARTs and EBNA1 expression; latency II includes LMP1 and LMP2 in addition to the latency I expressed products; and latency III is defined by the expression of all of the latent products [2]. EBVaGC is a latency I neoplasm and expresses EBNA1, EBERs and BARTs [4,14]. In addition, nearly half of EBVaGC cases express LMP2A [4].

LMP2A, which is encoded by the LMP2 gene, consists of 497 amino acids (aa), and interacts with cellular proteins mainly through its long N-terminal tail [4,14,15]. LMP2A may contribute to up-regulation of oncogenes, such as the Ras gene, or down-regulation of tumor suppressor gene, such as PTEN [16,17].

Human epidermal growth factor receptor-2 (HER2), a known proto-oncogene located on the long arm of human chromosome 17 (17q12), is a member of the epidermal growth factor receptor (EGFR) superfamily associated with tumor cell proliferation, apoptosis, adhesion, migration, and differentiation [18,19]. HER2 is overexpressed in many human epithelial malignancies, including breast cancer, ovarian cancer, bladder cancer and gastric carcinoma [20,21]. In gastric carcinomas, HER2 overexpression was associated with poor outcomes and aggressive disease [18,22]. In 2010, an open-label, phase 3, randomized controlled trial of trastuzumab in combination with chemotherapy versus chemotherapy alone for treatment of HER2-positive advanced gastric or gastro-esophageal junction cancer (ToGA) was undertaken in 122 centers in 24 countries. This ToGA study determined that 22.1% (810/3665) of gastric cancer cases overexpressed HER2, and trastuzumab, a monoclonal antibody that targets HER2, could be considered a new standard option for patients with HER2-positive gastric carcinomas and be helpful for improving survival in these patients [23].

Due to the pivotal role that HER2 plays in tumor growth and its relationship with therapeutic efficacy in gastric carcinomas, and because EBVaGC was

recently proposed as a subtype of gastric carcinoma [24], we wanted to examine the expression of HER2 in EBVaGC. Thus far, only a few studies have focused on this issue. Lee HS *et al.* from Korea showed that 1/63 (1.6%) EBVaGC cases exhibited HER2 overexpression, and 38/281 (13.5%) EBVnGC cases showed HER2 overexpression [25]. Sukawa Y *et al.* in Japan revealed that HER2 overexpression was found in one (5.6%) out of 18 EBVaGC cases and 19 (8.9%) out of 213 EBVnGC cases [26]. However, the clinicopathological features of EBVaGC and EBVnGC cases in both studies were not matched, and these unmatched clinicopathological features were not beneficial to reveal the influence of EBV on HER2 expression in the univariate analysis.

In this study, we explored HER2 expression in 78 EBVaGC and 216 EBVnGC clinicopathologically-matched cases by immunohistochemistry. We found a significantly reduced expression of HER2 in EBVaGC. Further, this reduction in HER2 expression may be induced by LMP2A, one of the EBV latency proteins, in EBVaGC through a pathway involving TWIST and YB-1. Moreover, LMP2A+/HER2<sup>low</sup> EBVaGC cases presented the best overall survival compared with LMP2A-/HER2<sup>low</sup> and LMP2A-/HER2<sup>high</sup> EBVaGC cases.

## RESULTS

### Suppression of HER2 expression in EBVaGC cases

EBVnGC cases were selected so that their clinicopathological features (sex, age, tumor differentiation, and TNM classification) statistically matched the EBVaGC cases (Table 1). Additionally, this matching of clinicopathological features ensured that further analysis of EBV effecting HER2 expression was univariate.

Gastric carcinoma samples were defined as high (2+, 3+) or low (0, 1+) expression of HER2 based on IHC results [23,27]. EBVaGC cases exhibited significantly less expression of HER2 than EBVnGC cases (5.1% versus 23.7%;  $p < 0.001$ ; Table 1). Representative IHC images of both EBER and HER2 expression in cancer cells are presented in Figure 1A.

Furthermore, clinicopathological characteristics of the EBVaGC and EBVnGC cases were evaluated based on HER2 expression. There were no significant differences observed in sex, age, tumor differentiation, or TNM classification between the HER2 2/3+ group and HER2 0/1+ group in EBVaGC (Table 2). However, cases with high HER2 expression presented significantly more distant metastases than low HER2 expression in EBVnGC ( $p = 0.038$ ; Table 2).

**Table 1: Clinicopathological characteristics and HER2 expression in EBVaGC and EBVnGC**

| Characteristic                      | EBVaGC<br>N (%) | EBVnGC<br>N (%) | † <i>p</i> |
|-------------------------------------|-----------------|-----------------|------------|
| Gender                              |                 |                 | 0.498      |
| Male                                | 57 (84.6)       | 149 (69.0)      |            |
| Female                              | 21 (15.49)      | 67 (31.0)       |            |
| Age (years)                         |                 |                 | 0.054      |
| ≤40                                 | 17 (21.8)       | 26 (12.0)       |            |
| 40~60                               | 42 (53.8)       | 114 (52.8)      |            |
| >60                                 | 19 (24.4)       | 76 (35.2)       |            |
| Mean ± SD‡                          | 52.4±13.6       | 55.1±12.0       |            |
| Lauren                              |                 |                 | 0.079      |
| Intestinal                          | 18 (23.1)       | 73 (33.8)       |            |
| Diffuse                             | 60 (76.9)       | 143 (66.2)      |            |
| Clinical Stage (pTNM) <sup>  </sup> |                 |                 | 0.142      |
| I, II                               | 20 (25.6)       | 75 (34.7)       |            |
| III, IV                             | 58 (74.4)       | 141 (65.3)      |            |
| Invasion                            |                 |                 | 0.102      |
| T1,T2                               | 10 (12.9)       | 46 (21.3)       |            |
| T3,T4                               | 68 (87.1)       | 170 (78.7)      |            |
| Nodal status                        |                 |                 | 0.504      |
| N-                                  | 20 (25.6)       | 64 (29.6)       |            |
| N+                                  | 58 (74.4)       | 152 (70.4)      |            |
| Distant metastasis                  |                 |                 | 0.106      |
| M0                                  | 76 (97.4)       | 199 (92.1)      |            |
| M1                                  | 2 (2.6)         | 17 (7.9)        |            |
| HER2                                |                 |                 | <0.001     |
| 0/1+                                | 74 (94.9)       | 165 (76.3)      |            |
| 2+                                  | 3 (3.8)         | 31 (14.4)       |            |
| 3+                                  | 1 (1.3)         | 20 (9.3)        |            |

†*p*-values were obtained from Pearson Chi-Square tests, Fisher's exact tests or Kruskal Wallis Test.  
‡SD: standard deviation. <sup>||</sup>AJCC TNM cancer staging system.

### Clinicopathological features and expression of HER2 in EBVaGC cases based on LMP2A

LMP2A was localized on the cell surface and in the cytoplasm of tumor cells (Figure 1B). Within the 78 EBVaGC, there were 34 cases that exhibited positive LMP2A expression (43.6%) by IHC. No significant correlations in sex, age, tumor differentiation, or TNM classification were found between LMP2A-positive and LMP2A-negative cases (Table 3). Further, none of the 34 LMP2A-positive EBVaGC cases showed high-expression of HER2 and 4 of 44 LMP2A-negative EBVaGC cases

(9.1%) exhibited high-expression of HER2. The rate of High HER2 expression in LMP2A-positive EBVaGC cases was not significantly different from that in LMP2A-negative EBVaGC cases (*p*=0.073; Table 3).

Detailed clinicopathological features of the 4 HER2 high-expressing EBVaGC cases are displayed in Table 4.

### Overexpression of LMP2A down-regulates HER2, TWIST and YB-1 expression in GC cells

Subsequently, SGC7901 cells were stably transfected with the LMP2A gene as described in the

**Table 2: Clinicopathological characteristics of patients with EBVaGC or EBVnGC based on HER2 expression**

|                                     | EBVaGC            |                  | †P    | EBVnGC             |                   | †P    |
|-------------------------------------|-------------------|------------------|-------|--------------------|-------------------|-------|
|                                     | HER2 0/1+<br>n=74 | HER2 2/3+<br>n=4 |       | HER2 0/1+<br>n=165 | HER2 2/3+<br>n=51 |       |
| Gender                              |                   |                  | 1.000 |                    |                   | 0.626 |
| Male                                | 53 (71.6)         | 4 (100)          |       | 106 (64.2)         | 33 (64.7)         |       |
| Female                              | 12 (28.4)         | 0                |       | 49 (35.8)          | 18 (35.3)         |       |
| Age (years)                         |                   |                  | 0.805 |                    |                   | 0.664 |
| ≤40                                 | 17 (23.0)         | 0                |       | 20 (12.1)          | 6 (11.8)          |       |
| 40~60                               | 39 (52.7)         | 3 (75.0)         |       | 82 (49.7)          | 22 (43.1)         |       |
| >60                                 | 18 (24.3)         | 1 (25.0)         |       | 63 (38.2)          | 23 (45.1)         |       |
| Lauren                              |                   |                  | 0.226 |                    |                   | 0.349 |
| Intestinal                          | 16 (21.6)         | 2 (50.0)         |       | 53 (32.1)          | 20 (39.2)         |       |
| Diffuse                             | 58 (78.4)         | 2 (50.0)         |       | 112 (67.9)         | 31 (60.8)         |       |
| Clinical Stage (pTNM) <sup>  </sup> |                   |                  | 1.000 |                    |                   | 0.565 |
| I, II                               | 19 (25.7)         | 1 (25.0)         |       | 59 (35.8)          | 16 (31.4)         |       |
| III, IV                             | 55 (74.3)         | 3 (75.0)         |       | 106 (64.2)         | 35 (68.6)         |       |
| Invasion                            |                   |                  | 1.000 |                    |                   | 0.263 |
| T1,T2                               | 10 (13.5)         | 0                |       | 38 (23.0)          | 8 (15.7)          |       |
| T3,T4                               | 64 (86.5)         | 4 (100)          |       | 127 (77.0)         | 43 (84.3)         |       |
| Nodal status                        |                   |                  | 1.000 |                    |                   | 0.275 |
| N-                                  | 14 (18.9)         | 1 (25.0)         |       | 52 (31.5)          | 12 (23.5)         |       |
| N+                                  | 60 (81.1)         | 3 (75.0)         |       | 113 (68.5)         | 39 (76.5)         |       |
| Distant metastasis                  |                   |                  | 1.000 |                    |                   | 0.038 |
| M0                                  | 72 (97.3)         | 4 (100)          |       | 156 (94.5)         | 43 (84.3)         |       |
| M1                                  | 2 (2.7)           | 0                |       | 9 (5.5)            | 8 (15.7)          |       |

†p-values were obtained from Pearson Chi-Square tests, Continuity Correction or Fisher's exact tests. ||AJCC TNM cancer staging system.

materials and methods. SGC7901-LMP2A cells exhibited a significant and reproducible up-regulation of LMP2A mRNA levels (528.9%±2.3%; Figure 2A) relative to SGC7901-pBabe cells, and the transcriptional levels of HER2, TWIST and YB-1 were down-regulated by 36.1%±8.1%, 87.6%±14.0% and 83.8%±5.7%, respectively, in SGC7901-LMP2A cells (Figure 2B). Western blotting analysis showed that HER2, TWIST and YB-1 decreased by 44%, 57% and 49%, respectively, in SGC7901-LMP2A cells following LMP2A up-regulation (Figure 2C). These results suggested that the exogenous overexpression of LMP2A in SGC7901 cells could suppress the expression of HER2, TWIST and YB-1 at the transcriptional level.

### LMP2A-targeted siRNA up-regulated HER2, TWIST and YB-1 expression in GC cells

Next, SNU719 cells were transiently nucleofected with LMP2A siRNA or a universal siRNA control. qRT-PCR tests showed that LMP2A mRNA levels were decreased by 77.2%±19.3%, 89.1%±13.9% and 82.4%±17.9% at 24, 48 and 72 h, respectively, in siLMP2A-transfected SNU719 cells compared with universal siRNA control-transfected SNU719 cells (Figure 2D). Meanwhile, at 24, 48 and 72 h in siLMP2A-transfected SNU719 cells, the mRNA level of HER2 was increased to 114.0%±11.5%, 276.7%±14.6% and 328.2%±6.1%, respectively, the mRNA level of TWIST was up-regulated to 1211.3%±11.2%, 1284.8%±38.2% and 1037.2%±8.6%, respectively, and the YB-1 mRNA level was increased to 193.5%±16.8%, 332.0%±15.5%

**Table 3: Clinicopathological characteristics of patients with EBVaGC based on LMP2A expression**

|                                     | LMP2A Positive<br>N (%) | LMP2A Negative<br>N (%) | † <i>p</i> |
|-------------------------------------|-------------------------|-------------------------|------------|
| Gender                              |                         |                         | 0.08       |
| Male                                | 26 (76.5)               | 40 (90.9)               |            |
| Female                              | 8 (23.5)                | 4 (9.1)                 |            |
| Age (years)                         |                         |                         | 0.465      |
| ≤40                                 | 6 (17.5)                | 11 (25.0)               |            |
| 40~60                               | 21 (61.9)               | 21 (47.7)               |            |
| >60                                 | 7 (20.6)                | 12 (27.3)               |            |
| Lauren                              |                         |                         | 0.934      |
| Intestinal                          | 8 (23.5)                | 10 (22.7)               |            |
| Diffuse                             | 26 (76.5)               | 34 (77.3)               |            |
| Clinical Stage (pTNM) <sup>  </sup> |                         |                         | 0.503      |
| I, II                               | 10 (29.4)               | 10 (22.7)               |            |
| III, IV                             | 24 (70.6)               | 34 (77.3)               |            |
| Invasion                            |                         |                         | 0.436      |
| T1,T2                               | 6 (17.6)                | 4 (9.1)                 |            |
| T3,T4                               | 28 (82.4)               | 40 (90.9)               |            |
| Nodal status                        |                         |                         | 1.000      |
| N-                                  | 7 (20.6)                | 9 (20.5)                |            |
| N+                                  | 27 (79.4)               | 35 (79.5)               |            |
| Distant metastasis                  |                         |                         | 1.000      |
| M0                                  | 34 (100)                | 42 (95.5)               |            |
| M1                                  | 0                       | 2 (4.5)                 |            |
| HER2                                |                         |                         | 0.073      |
| 0/1+                                | 34 (100)                | 40 (90.9)               |            |
| 2+                                  | 0                       | 3 (6.8)                 |            |
| 3+                                  | 0                       | 1 (2.3)                 |            |

†*p*-values were obtained from Pearson Chi-Square tests, Continuity Correction or Kruskal Wallis Test. <sup>||</sup>AJCC TNM cancer staging system.

and 289.0%±12.0%, respectively (Figure 2E). Further, Western blotting analysis showed that LMP2A expression was decreased by 81% at 48 h in siLMP2A-transfected SNU719 cells, and HER2, TWIST and YB-1 expression was increased to 212%, 457% and 232%, respectively (Figure 2F).

These results demonstrate that silencing of LMP2A by siRNA in SNU-719 cells may induce the up-regulation of HER2, TWIST and YB-1 expression at the transcriptional level.

### **Influence of LMP2A overexpression or silencing on TWIST and YB-1 intracellular localization**

As transcription factors, the nuclear proteins of TWIST and YB-1 play the important role of triggering changes in HER2 expression [28-31]. To determine whether LMP2A is able to change the subcellular distribution of TWIST or YB-1, cytoplasmic and nuclear protein fractions prepared from SGC7901-LMP2A and SGC7901-pBabe cells were blotted and probed for TWIST, YB-1, vinculin and lamin B1. The nucleus/cytoplasm ratio of the TWIST and YB-1 proteins were decreased by 85% and 80%, respectively, in SGC7901-LMP2A

cells relative to the vector-transfected cells (Figure 3B and 3C). Additionally, subcellular localization studies were performed on SNU719 cells that were transiently nucleofected with LMP2A siRNA or a universal siRNA control. The cytoplasmic and nuclear protein fractions were prepared 48 h after transfection. A 4.00-fold increase in TWIST (Figure 3D) and a 3.57-fold up-regulation in YB-1 (Figure 3E) were observed in the nuclear fraction of SNU719 siRNA cells when normalized to the cytoplasmic fraction.

Furthermore, SGC7901-LMP2A cells were plated on coverslips, fixed and stained for TWIST (green) or YB-1 (green) and nuclei (blue). Compared with SGC7901-pBabe cells, SGC7901-LMP2A cells exhibited a significantly decreased level of the TWIST (Figure 3F) and YB-1 (Figure 3G) proteins both in the nucleus and in the cytoplasm. There was a morphologic change of YB-1 to granular structures in the cytoplasm (white arrows) after LMP2A overexpression.

These results further showed that LMP2A can inhibit both the nuclear and cytoplasmic fractions of

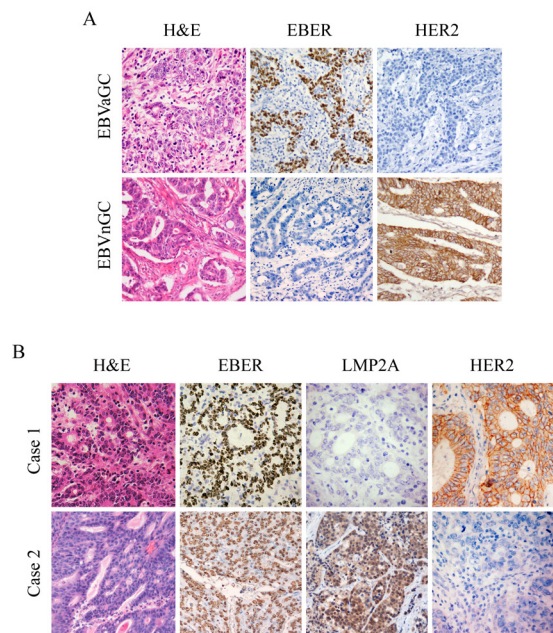

**Figure 1: IHC images for expression of HER2, EBER and LMP2A in gastric tumor specimens.** Each of the gastric carcinoma cases was stained by H&E, IHC and EBER-1 *in situ* hybridization, respectively. For EBER-1 *in situ* hybridization, the positive signals were restricted only to the tumor nuclei but not in surrounding non-tumor cells. For HER2 IHC staining, positive staining can be seen in the membrane of the tumor cells. (A) Representative images for expression of HER2 in EBVaGC and EBVnGC samples. (B) Representative images of LMP2A and HER2 expression in EBVaGC samples. Case 1 showed negative expression of LMP2A with overexpression of HER2 (3+), and case 2 exhibited positive expression of LMP2A with no apparent expression of HER2 (0). (Original magnification  $\times 200$ ).

TWIST and YB-1, particularly the compositional ratio of the nuclear fraction.

## Effects of EBV, LMP2A and HER2 on overall survival

To evaluate the effects of EBV, LMP2A and HER2 on clinical outcome, overall survival data of our cohort

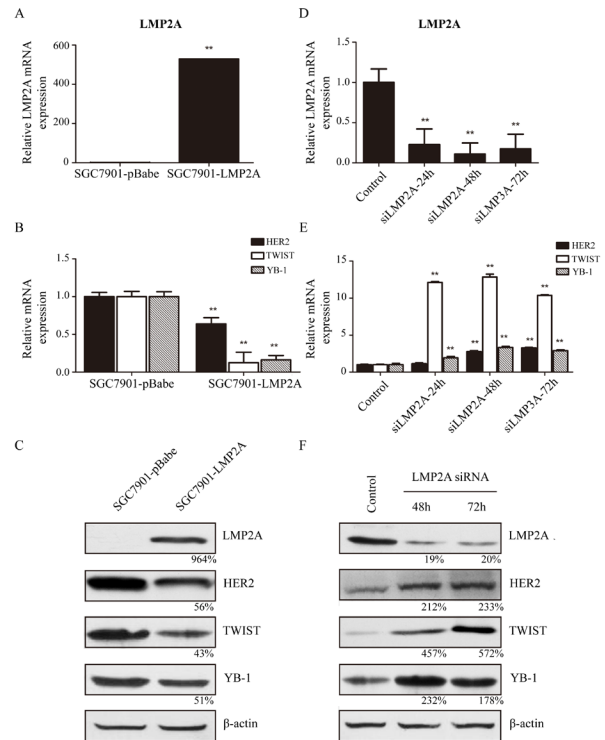

**Figure 2: LMP2A inhibited expression of HER2, TWIST and YB-1 on both transcriptional and translational levels.** SGC7901 cells were stably nucleofected with an empty pBabe vector or vector subcloned with LMP2A. (A) qRT-PCR suggested that level of LMP2A mRNA was up-regulated in five hundred fold in SGC7901-LMP2A cells ( $**p < 0.001$  vs SGC7901-pBabe cells). (B) Following LMP2A mRNA levels increased, the mRNA levels of HER2, TWIST and YB-1 were significantly decreased ( $**p < 0.001$  vs SGC7901-pBabe cells). (C) Western blot analysis shows that the protein levels of HER2, TWIST and YB-1 were also reduced after LMP2A was exogenous overexpressed in SGC7901-LMP2A cells relative to SGC7901-pBabe cells. SNU719 cells were transiently nucleofected with LMP2A siRNA or a universal siRNA control for 24, 48 and 72 h. (D) qRT-PCR showed that the mRNA level of LMP2A in SNU719 siLMP2A cells was down-regulated after interfering 24h, and reduced by 89.1% at 48h ( $**p < 0.001$  vs control SNU719 cells). (E) When LMP2A mRNA levels decreased, mRNA levels of TWIST and YB-1 were significantly up-regulated by 12.84- and 3.32-fold at 48h, and HER2 mRNA increased by 3.28-fold at 72h ( $**p < 0.001$  vs control SNU719 cells). (F) Western blot analysis exhibited that the protein levels of HER2, TWIST and YB-1 were also increased after LMP2A was siRNA silenced in SNU719 siLMP2A cells relative to control SNU719 cells.

**Table 4: Clinicopathological characteristics of 4 EBVaGC cases with HER2 high-expression**

| Case | Gender | Age(years) | Lauren | Clinical Stage (pTNM) | Invasion | Nodal status | Distant metastasis | HER2 |
|------|--------|------------|--------|-----------------------|----------|--------------|--------------------|------|
| 1    | M      | 45         | dif    | IIIA                  | T3       | N2           | M0                 | 2+   |
| 2    | M      | 57         | dif    | IIIA                  | T3       | N2           | M0                 | 2+   |
| 3    | M      | 58         | int    | IIIB                  | T3       | N3           | M0                 | 3+   |
| 4    | M      | 76         | int    | IIA                   | T3       | N0           | M0                 | 2+   |

Abbreviations: F, female; M, male; dif, Diffuse type; int, Intestinal type.

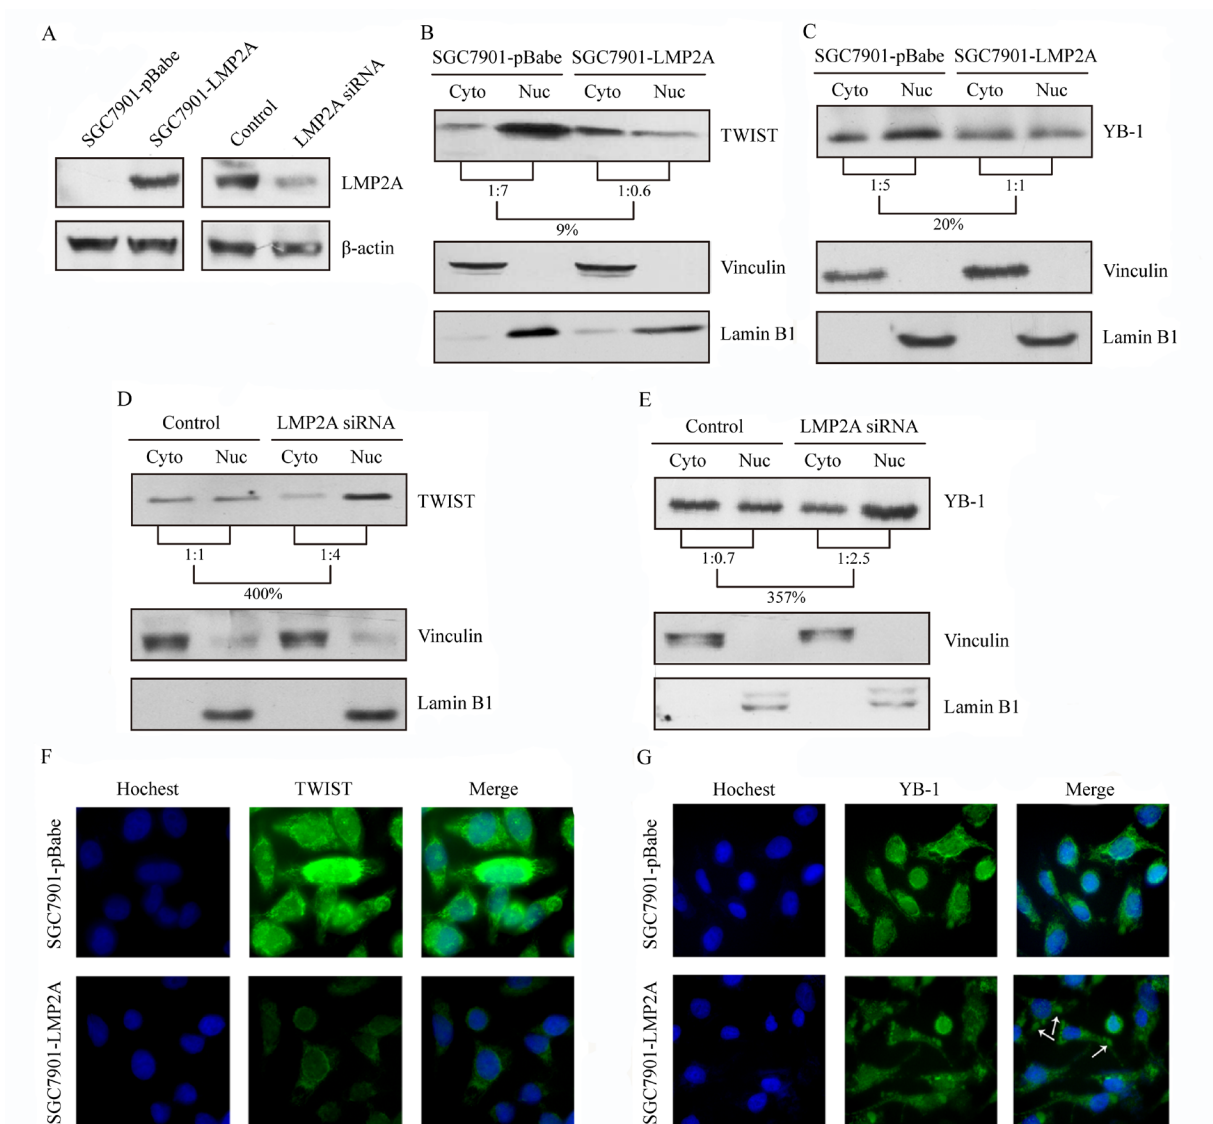

**Figure 3: LMP2A down-regulated the compositional ratio of the nuclear fractions of TWIST and YB-1, and trigger their changes of subcellular localization.** (A) LMP2A was stably overexpressed in SGC7901 cells and transiently silenced in SNU719 cells for 48 h. Western blot analysis exhibited the effect of the transfections. (B, C) The nucleus/cytoplasm ratio of TWIST (B) and YB-1 (C) decreased to 9% and 20%, respectively, after LMP2A was overexpressed in SGC7901-LMP2A cells. (D, E) Following LMP2A silenced in SNU719 siLMP2A cells, the compositional ratios of the nuclear fractions of TWIST (D) and YB-1 (E) were up-regulated to 400% and 357%, respectively. Vinculin and Lamin B1 were used as markers for the cytoplasmic and nuclear fractions respectively. (F, G) Immunofluorescent analysis showed that SGC7901-LMP2A cells have a substantial decrease in TWIST (green; F) and YB-1 (green; G) staining in both cytoplasmic and nuclear areas, and Hoechst staining was used to counter stain nuclei (blue).

were collected and 63 of 78 EBVaGC cases and all 216 EBVnGC cases had complete overall survival data.

Initially, the effect of EBV on clinical outcome was analyzed. Kaplan-Meier overall survival curves were plotted, and a significantly longer overall survival was shown for EBVnGC compared with EBVaGC by log-rank tests ( $p < 0.001$ ; Figure 4A).

Of the 63 EBVaGC cases, the Kaplan-Meier overall survival curve of LMP2A- ( $n=39$ ) and LMP2A+ ( $n=24$ ) groups is depicted in Figure 4B, as well as the log-rank test result. Better overall survival was observed in the LMP2A+ group ( $p=0.013$ ).

Next, we statistically analyzed the differences in overall survival time among the LMP2A-/HER2<sup>low</sup> ( $n=36$ ), LMP2A-/HER2<sup>high</sup> ( $n=3$ ) and LMP2A+/HER2<sup>low</sup> ( $n=24$ ) groups. The log-rank test showed that there was a significant difference among the three groups ( $p=0.003$ ), and the LMP2A+/HER2<sup>low</sup> group exhibited the best overall survival (Figure 4C).

In addition, overall survival data for the 216 EBVnGC cases were classified into HER2<sup>low</sup> ( $n=165$ ) and HER2<sup>high</sup> ( $n=51$ ) groups. The estimated product-limit survival functions of HER2 and the results of log-rank

tests are shown in Figure 4D, and the HER2<sup>low</sup> group exhibited better overall survival ( $p=0.027$ ).

## DISCUSSION

In the present study, we found that HER2 expression is significantly reduced in EBVaGC compared with EBVnGC. Additionally, LMP2A, which is one of the EBV latency proteins, may participate in this reduction in HER2 expression in EBVaGC through a pathway involving TWIST and YB-1. Moreover, LMP2A+/HER2<sup>low</sup> EBVaGC cases presented the best overall survival when compared with LMP2A-/HER2<sup>low</sup> and LMP2A-/HER2<sup>high</sup> EBVaGC cases.

In this cohort, 78 EBVaGC were identified from 1362 gastric carcinomas by EBER *in situ* hybridization, and the predominance of younger patient age, male gender and diffuse-type histology of EBVaGC is consistent with findings from recent studies [4,5]. Therefore, 216 EBVnGC cases, whose clinicopathological features were statistically matched with the 78 EBVaGC cases, were selected for further IHC study. This matching of

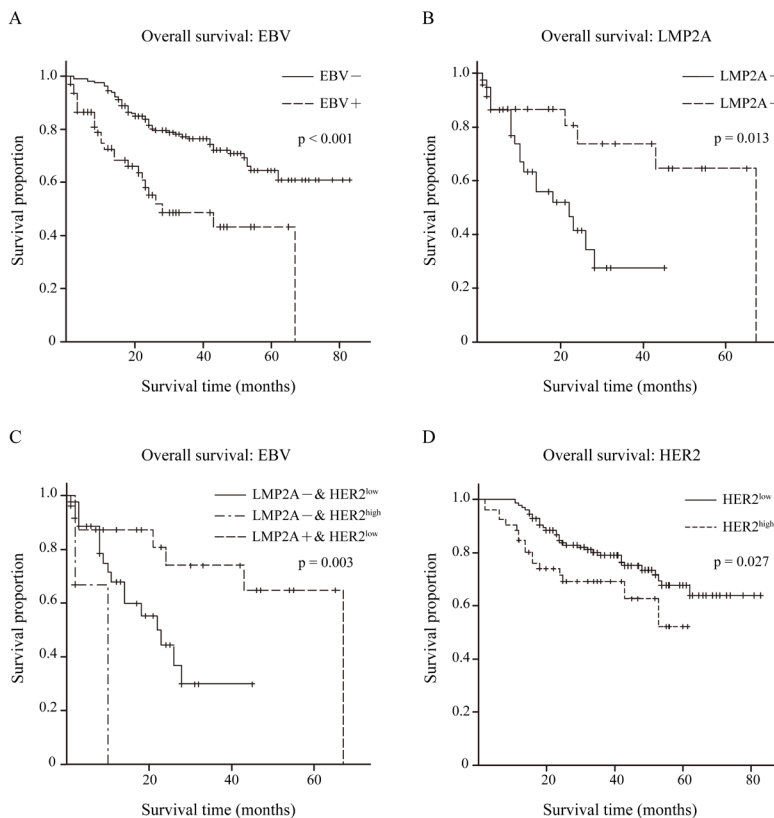

**Figure 4: Overall survival condition within 279 GC patients.** (A) Kaplan-Meier curves for overall survival time in 279 GC patients according to EBV expression,  $p < 0.001$  by log-rank test. EBV- group  $n=216$ , EBV+ group  $n=63$ . (B) Kaplan-Meier curves for overall survival time in 63 EBVaGC patients according to LMP2A expression,  $p=0.013$  by log-rank test. LMP2A-  $n=39$ , LMP2A+  $n=24$ . (C) Kaplan-Meier curves for overall survival time in 63 EBVaGC patients based on both LMP2A and HER2 expression,  $p=0.003$  by log-rank test. LMP2A- & HER2<sup>low</sup> (0/1+)  $n=36$ , LMP2A- & HER2<sup>high</sup> (2/3+)  $n=3$ , LMP2A+ & HER2<sup>low</sup> (0/1+)  $n=24$ . (D) Kaplan-Meier curves for overall survival time in 216 EBVnGC patients according to HER2 expression,  $p=0.027$  by log-rank test. HER2<sup>low</sup> (0/1+)  $n=165$ , HER2<sup>high</sup> (2/3+)  $n=51$ .



clinicopathological features is helpful for eliminating the influence of clinicopathological features from revealing the relationship between EBV and HER2 expression in univariate analysis.

IHC analysis showed that HER2 expression is significantly reduced in EBVaGC compared with EBVnGC. In 2004, Lee HS *et al.* reported that 1 (1.6%) of 63 cases were high HER2 expressing in EBVaGC by IHC, which is less than in EBVnGC (13.5% of 281) [25]. Studies by Sukawa Y *et al.* in 2012 showed one case with HER2 overexpression of 18 EBVaGC cases (5.6%) compared with 19/213 (8.9%) EBVnGC cases [26]. Moreover, Bar-Sela G *et al.* demonstrated that none of 49 NPC cases, which is also an epithelial malignancy with consistent worldwide association with EBV, exhibited HER2 overexpression [32]. Consistent with these studies, this research suggests that EBV may contribute to down-regulation of HER2 expression in EBVaGC.

Because it belongs to the latency I pattern, EBVaGC expresses EBERs, BARTs and EBNA1. In addition, nearly half of EBVaGC express LMP2A [4,14]. In this study, 43.6% of EBVaGC cases showed LMP2A positive expression by IHC analysis. None of the 34 LMP2A-positive EBVaGC showed high HER2 expression, and all 4 HER2 high-expressing EBVaGC cases were LMP2A-negative. Statistical analysis showed no significant correlation between LMP2A and HER2 expression in EBVaGC. This non-correlation may be due to two factors: first, because of the low rate of high HER2 expression in EBVaGC, a larger EBVaGC cohort may be needed to reveal the statistically significant relationship between LMP2A and HER2 expression; second, there are other fragments encoded by EBV that may suppress HER2 expression in EBVaGC simultaneously, such as EBNA1 which was reported to be a suppressor of HER2 in human ovarian cancer [33,34]. However, ovarian cancers, in which EBV is not presented based on EBER *in situ* hybridization, are not actually EBV-associated epithelial malignancies [4]. Whether EBNA1 could also suppress HER2 expression in EBVaGC remains unknown and needs to be further studied.

Karlra J *et al.* suggested that the TWIST-YB-1 axis was involved in the regulation of HER2 expression [29]. TWIST, a basic helix-loop-helix transcription factor, is known to bind to E-box regions within the YB-1 promoter and thus regulate YB-1 expression [35,36]. Additionally, TWIST is reported to be expressed in gastric cancer, breast cancer, hepatocellular carcinoma, prostate cancer, esophageal squamous cell carcinoma, bladder cancer and pancreatic cancer and its nuclear localization contributes to the up-regulation of YB-1 expression [37,38]. YB-1 was initially reported to interact with the Y-box element in the 5' regulatory element of the HER2 gene [39], and nuclear YB-1 can trigger HER2 expression, which was confirmed by CHIP assay in gastric carcinoma cell lines MKN45, SNU216, and NCI-N87 [28,31,40].

In this study, overexpressing LMP2A can down-regulate expression of TWIST, YB-1 and HER2 in the EBV-negative cell line SGC7901, siRNA silencing of LMP2A can up-regulate TWIST, YB-1 and HER2 expression in the EBV-positive cell line SNU719, and LMP2A overexpression can decrease both nuclear and cytoplasmic fractions of TWIST and YB-1, especially the compositional ratio of the nuclear fractions.

Interestingly, using immunofluorescent analysis to locate YB-1 in SGC7901 cells, some granular structures formed by YB-1 were observed in the cytoplasm following LMP2A overexpression. J Kalra *et al.* showed the same morphologic change in YB-1 when YB-1 was suppressed in breast cancer cell lines LCC6<sup>Her2</sup> and SKBR3 [29]. These granular structures may be stress granules (SGs) which are thought to be sites of stalled translation and appear when YB-1 is suppressed. By formatting these SGs, progress of HER2 translation is inhibited [41-43]. Hence, tests *in vitro* suggested that LMP2A could down-regulate expression of HER2 in gastric cell lines, and this reduction in HER2 expression induced by LMP2A may be achieved through the TWIST-YB-1 axis.

To further evaluate the effect of inhibition of HER2 expression via LMP2A on prognosis, we analyzed overall survival data for 63 EBVaGC that were sub-grouped according to LMP2A and HER2 expression. LMP2A+/HER2<sup>low</sup> EBVaGC cases had better overall survival compared with LMP2A-/HER2<sup>low</sup> and LMP2A-/HER2<sup>high</sup> EBVaGC cases, and the last group exhibited the worse overall survival.

Meanwhile, we explored a possible correlation between LMP2A expression and the overall survival of EBVaGC. We showed that patients with LMP2A expression had a better overall survival rate than those without LMP2A expression in EBVaGC. Thus far, no dedicated article has presented a correlation between LMP2A expression and prognosis in EBV-associated epithelial malignancies, including NPC and gastric carcinoma. While Mao *et al.* reported that LMP2A-positive cases had a significantly lower overall survival rate than LMP2A-negative cases in nasal type NK/T lymphomas [44]. This inconsistency may be due to the difference in tumor type and latency type (NK/T lymphoma is latency II neoplasm) [4].

In addition, worse overall survival was observed in EBVaGC compared with EBVnGC, but pooled analysis from Camargo MC *et al.* presented a significantly better survival time for EBVaGC than EBVnGC [10,11]. Van Beek *et al.* reported that no difference was observed in overall survival of EBVaGC (n=41) compared with EBVnGC (n=525) [13]. We think there are three possible reasons for these results. First, the clinicopathological features may influence the clinical outcome in gastric carcinoma. For example, advanced tumor stage, lymph node metastasis and older age were correlated with poor prognosis [45]. The EBVaGC and EBVnGC cases in

the above studies were not always clinicopathological-feature matched. In the present study, however, we used clinicopathological-feature matched EBVaGC and EBVnGC cases, which may eliminate the influence of clinicopathological features on prognosis when univariate analysis was performed. Second, in the pooled analysis from Camargo MC *et al.*, some studies defined EBVaGC by qRT-PCR testing and not EBER *in situ* hybridization. The qRT-PCR testing cannot avoid the interference of lymphocytes in the stroma, which can also be infected with EBV. Thus, identifying EBVaGC by qRT-PCR does not conform to the definition of EBVaGC, which is that EBV must be proved to be present in gastric carcinoma cells by EBER *in situ* hybridization [10,11,13]. Last, the inconsistency among these studies may also be due to geographic location and ethnic variations.

In conclusion, this study indicates for the first time that there is reduced expression of HER2 in EBVaGC compared with EBVnGC based on a clinicopathological-feature matched cohort. This reduction may be induced by LMP2A through the TWIST/YB-1 axis in EBVaGC. Moreover, LMP2A+/HER2<sup>low</sup> EBVaGC cases may be correlated with a better prognosis than LMP2A-/HER2<sup>low</sup> and LMP2A-/HER2<sup>high</sup> EBVaGC cases. These findings extend our knowledge about EBV such that although EBV is recognized as an oncogenic virus, some products of EBV, such as LMP2A, may down-regulate HER2 expression and possibly be helpful to improve outcomes in gastric carcinoma patients. Further studies are needed to precisely confirm the functional domain of LMP2A, which can down-regulate HER2, avoid LMP2A's own oncogenic potential, and serve as a potential target for treating gastric carcinoma with high HER2 expression.

## MATERIALS AND METHODS

### Ethics statement

The use of human subjects was approved by the Clinical Research Ethics Committee of the Third Affiliated Hospital, Sun Yat-sen University, Guangzhou, China. All adult subjects provided informed consent, and a patient or guardian of any children participant provided informed consent on their behalf. Ethical guidelines under the Declaration of Helsinki were followed.

### Tumor tissue microarrays

The files of 1362 surgical resection gastric adenocarcinoma cases were collected at the First, Second and Third Affiliated Hospitals of Sun Yat-sen University and the Guangzhou First Municipal People's Hospital, Guangzhou, southern China from January 1, 2000 to December 31, 2012.

Twenty-nine tissue microarray (TMA) blocks, containing the total of 1362 cases, were conducted as described by Chen JN *et al* [8]. Four  $\mu$ m thick sections were cut from each tissue array block to further detect EBV infection status using an *in situ* hybridization assay for EBV-encoded small RNA-1 (EBER-1). EBER-1 (+) and EBER-1 (-) cases were defined as EBVaGC and EBVnGC, respectively. Of the 1362 cases, 78 cases (5.7%) were identified as EBVaGC.

### *In situ* hybridization (ISH)

An ISH assay was performed on the TMA block sections with an EBV oligonucleotide probe complementary to the EBER-1 (PanPath, Amsterdam, Netherlands), according to the manufacturer's instructions. Sections from a known EBER-1-positive NPC tissue were used as the positive controls and a sense probe for EBER-1 was used as the negative control.

### Tissue specimens

Clinical-pathological parameter-matched 78 EBVaGC and 216 EBVnGC were selected from the 1362 GC cases. Clinicopathologic data were obtained from the archives of the four Departments of Pathology. Histology of the gastric carcinomas was classified as intestinal- and diffuse-type, according to the Lauren classification [46]. Cancer staging was classified according to the TNM cancer staging system of the American Joint Committee of Cancer [47]. The clinical outcome was followed up from the date of gastric carcinoma resection until the date of death from patients directly or families by phone-call or letters. The follow-up period was 1- 83 months (median 26 months)

### Immunohistochemical staining

The Envision Immunohistochemistry (IHC) system was used to analyze the expression of HER2 and LMP2A [48]. The slides were incubated with a rabbit-derived polyclonal antibody against HER2 (A0485, 1:200 dilution; Dako, Copenhagen, Denmark) or a mouse-derived monoclonal antibody against LMP2A (clone 4A11B3A3, 1:100; a gift from Prof. Mu-sheng Zeng) as the primary antibody [49] and a HRP-labeled secondary antibody (Dako Envision). A HER2-positive breast carcinoma and a LMP2A-positive NPC case were used as positive controls and substitution of the primary antibodies with TBS was used as a negative control.

The HER2 IHC staining results were scored into 0, 1+, 2+ and 3+ according to the criteria recommended by the ToGA test [23]. And LMP2A was localized on the cell membrane and in the cytoplasm of the tumor cells. All of

the slides were evaluated by two experienced pathologists without knowledge of the patient or patients' clinical status.

### Cell lines and transfections

The EBV-negative SGC-7901 human gastric carcinoma cell line (Cell Bank of Type Culture Collection of Chinese Academy of Sciences, Shanghai, China) and the EBV-positive SNU-719 human gastric carcinoma cell line (Korean Cell Line Bank, Seoul, Korea) were maintained in Roswell Park Memorial Institute (RPMI) 1640 medium (Gibco) supplemented with 10% fetal bovine serum (FBS) in a humidified 5% CO<sub>2</sub> incubator at 37°C. All of the cell lines were tested to ensure that they were mycoplasma free.

Recombinant retroviruses expressing either vector pBabe or pBabe subcloned with LMP2A were gifted from Dr. Mu-Sheng Zeng (Sun Yat-Sen University Cancer Center, Guangzhou, China) [49] and the plasmid DNA was transfected into SGC-7901 cell lines by using Lipofectamine 2000 (Invitrogen, Carlsbad, CA, USA) according to the manufacturer's instructions. Pooled SGC-7901 cell populations expressing either pBabe or pBabe-LMP2A were selected with 0.5 µg/ml of puromycin (Sigma-Aldrich, St. Louis, MO).

### Small RNA interference

Target siRNA duplex and control scrambled siRNA duplex were synthesized by Invitrogen (Carlsbad, CA, USA). The siRNA target sequence to LMP2A mRNA is 5'-AACUCCCAAUAUCCAUCUGCU-3', which does not overlap with the sequences of LMP2B [50]. The siRNA duplex was transfected using Lipofectamine RNAiMAX Reagent (Invitrogen) as recommended by the manufacturer, and the cells were assayed for silencing one or two days after transfection.

### RNA extraction and real time RT-PCR

Total RNA from different cell lines was extracted by using the E.Z.N.A. Total RNA Kit I (OMEGA, USA). The purity of each RNA sample was determined by assessing the A260/A280 ratio, which consistently measured between 1.6 and 1.8. The RNA was reverse transcribed using the PrimeScript 1st Strand cDNA Synthesis Kit (TAKARA, Dalian, China) according to the manufacturer's instructions. Then, real-time quantitative reverse transcription-polymerase chain reaction (RT-PCR) analysis was performed on an ABI 7500 FAST Real-Time PCR System by using SYBR® *Premix Ex Taq*<sup>TM</sup> II (TAKARA). Quantitative determination of RNA levels were performed in three independent experiments.

The housekeeping gene GAPDH was used as an internal control to normalize the expression levels of different genes. The primers used were listed in Supplementary Table S1.

### Western blot analysis

Western blotting analysis was used to semiquantitatively determine LMP2A, TWIST, YB-1 and HER2 protein levels. The primary antibodies used were anti-LMP2A (a gift from Prof. Mu-sheng Zeng), anti-TWIST (H81; Santa Cruz Biotechnology, Santa Cruz, CA, USA), anti-YB-1 (D299), anti-HER2 (D8F12), anti-β-actin (13E5), anti-vinculin (E1E9V) and anti-Lamin B1 (D9V6H; Cell Signaling Technology, Beverly, MA, USA).

For whole-cell proteins studies, proteins were harvested by homogenizing cells in lysis buffer (50 mM Tris/HCl pH 8.5, 150 mM NaCl, 0.02% sodium azide, 0.1% SDS, 1% NP-40 and 0.5% sodium deoxycholate). Protein concentrations were determined using the Bio-Rad protein assay (Bio-Rad, Richmond, CA). Equal amounts of samples were separated on 8% or 10% SDS-PAGE gels, and transferred to polyvinylidene fluoride membranes (Millipore, Bedford, MA, USA). The blots were then probed with the appropriate HRP conjugated secondary antibodies and visualized using ECL (Thermo). The experiments were conducted at least three times. The results were quantified using Quantity One v4.62.

For subcellular localization studies, nuclear and cytoplasmic proteins were separated with NE-PER Nuclear and Cytoplasmic Extraction Reagents (Thermo, Rockford, IL, USA) after whole-cell proteins extracted. Other steps of immunoblot were the same as whole-cell proteins studies.

### Immunofluorescence analysis (IF)

Cells grown on coverslips were fixed using a 4% paraformaldehyde solution in phosphate-buffered saline (PBS), permeabilized with 2.5% Triton X-100 at room temperature before staining with primary antibody of YB-1 or TWIST, the same antibodies used for western blotting, at a dilution of 1:100 or 1:1, respectively. Primary antibody binding was detected by further incubations with anti-rabbit or anti-mouse Alexa488 (Cell Signaling Technology), respectively. Hoechst (Molecular Probes, Eugene, OR, USA; 1:1000) was used to visualize the nuclei. The cells were viewed using a Leica fluorescent microscope. Images were captured using DC100 digital camera and Open Lab software.

## Statistical analysis

A chi-square test, Fisher's exact test or Kruskal Wallis test was used for statistical analysis of the IHC results and clinicopathologic findings. And the expression of mRNA or proteins was analyzed using non-paired Student's t-test. Overall survival analyses were performed using the Kaplan-Meier method and log-rank test. The overall survival time to event was defined as the time of surgery until death, irrespective of the cause of death. The results were considered to be statistically significant at a p-value of less than 0.05. All of the p-values presented in this study are two-sided. All of the statistical analyses were performed with the SPSS 13.0 statistical software program for Windows (SPSS Inc., Chicago, Illinois, USA).

## ACKNOWLEDGMENTS

We appreciate Prof. Mu-Sheng Zeng from Sun Yat-Sen University Cancer Center for supporting vector and monoclonal antibody against LMP2A as gifts in the completion of this article.

## Funding

National Natural Science Foundation of China (No. 81071893 & No. 81272553).

Guangdong Natural Science Foundation (No. S2012020010898), Guangdong Province, China.

Guangzhou Science and Technology Project (No. 2011J4100106), Guangdong Province, China.

## Conflicts of interest

None

## Abbreviations

HER2, human epidermal growth factor receptor-2; EBV, Epstein-Barr virus; EBVaGC, EBV-associated gastric carcinoma; EBVnGC, EBV-negative gastric carcinoma; LMP2A, latent membrane protein 2A; EBNA, EBV nuclear antigen; EBER, EBV-encoded small non-coding RNA; BARTs, BamHI A rightward transcripts.

## REFERENCES

- 1 Klein G. Epstein-Barr virus strategy in normal and neoplastic B cells. *Cell* 1994;77:791-793.
- 2 Thompson MP, Kurzrock R. Epstein-Barr virus and cancer. *Clin Cancer Res* 2004;10:803-821.
- 3 Young LS, Rickinson AB. Epstein-Barr virus: 40 years on. *Nat Rev Cancer* 2004;4:757-768.
- 4 Fukayama M, Ushiku T. Epstein-Barr virus-associated gastric carcinoma. *Pathol Res Pract* 2011;207:529-537.
- 5 Lee JH, Kim SH, Han SH, An JS, Lee ES, Kim YS. Clinicopathological and molecular characteristics of Epstein-Barr virus-associated gastric carcinoma: A meta-analysis. *J Gastroenterol Hepatol* 2009;24:354-365.
- 6 Chen JN, He D, Tang F, Shao CK. Epstein-Barr virus-associated gastric carcinoma: A newly defined entity. *J Clin Gastroenterol* 2012;46:262-271.
- 7 Shibata D, Weiss LM. Epstein-Barr virus-associated gastric adenocarcinoma. *Am J Pathol* 1992;140:769-774.
- 8 Chen JN, Ding YG, Feng ZY, Li HG, He D, Du H, Wu B, Shao CK. Association of distinctive Epstein-Barr virus variants with gastric carcinoma in Guangzhou, southern China. *J Med Virol* 2010;82:658-667.
- 9 Moritani S, Kushima R, Sugihara H, Hattori T. Phenotypic characteristics of Epstein-Barr-virus-associated gastric carcinomas. *J Cancer Res Clin Oncol* 1996;122:750-756.
- 10 Camargo MC, Kim WH, Chiaravalli AM, Kim KM, Corvalan AH, Matsuo K, Yu J, Sung JJ, Herrera-Goepfert R, Meneses-Gonzalez F, Kijima Y, Natsugoe S, Liao LM, et al. Improved survival of gastric cancer with tumour Epstein-Barr virus positivity: An international pooled analysis. *Gut* 2014;63:236-243.
- 11 Camargo MC, Murphy G, Koriyama C, Pfeiffer RM, Kim WH, Herrera-Goepfert R, Corvalan AH, Carrascal E, Abdirad A, Anwar M, Hao Z, Kattoor J, Yoshiwara-Wakabayashi E, et al. Determinants of Epstein-Barr virus-positive gastric cancer: An international pooled analysis. *Br J Cancer* 2011;105:38-43.
- 12 Huang SC, Ng KF, Chen KH, Hsu JT, Liu KH, Yeh TS, Chen TC. Prognostic factors in Epstein-Barr virus-associated stage I-III gastric carcinoma: Implications for a unique type of carcinogenesis. *Oncol Rep* 2014
- 13 van Beek J, Zur HA, Klein KE, van de Velde CJ, Middeldorp JM, van den Brule AJ, Meijer CJ, Bloemena E. EBV-positive gastric adenocarcinomas: A distinct clinicopathologic entity with a low frequency of lymph node involvement. *J Clin Oncol* 2004;22:664-670.
- 14 Imai S, Koizumi S, Sugiura M, Tokunaga M, Uemura Y, Yamamoto N, Tanaka S, Sato E, Osato T. Gastric carcinoma: Monoclonal epithelial malignant cells expressing Epstein-Barr virus latent infection protein. *Proc Natl Acad Sci U S A* 1994;91:9131-9135.
- 15 Fruehling S, Longnecker R. The immunoreceptor tyrosine-based activation motif of Epstein-Barr virus LMP2A is essential for blocking BCR-mediated signal transduction. *Virology* 1997;235:241-251.
- 16 Fukuda M, Longnecker R. Epstein-Barr virus latent membrane protein 2A mediates transformation through constitutive activation of the Ras/PI3-K/Akt Pathway. *J Virol* 2007;81:9299-9306.
- 17 Hino R, Uozaki H, Murakami N, Ushiku T, Shinozaki A, Ishikawa S, Morikawa T, Nakaya T, Sakatani T, Takada

- K, Fukayama M. Activation of DNA methyltransferase 1 by EBV latent membrane protein 2A leads to promoter hypermethylation of PTEN gene in gastric carcinoma. *Cancer Res* 2009;69:2766-2774.
- 18 Gravalos C, Jimeno A. HER2 in gastric cancer: A new prognostic factor and a novel therapeutic target. *Ann Oncol* 2008;19:1523-1529.
  - 19 Hynes NE, Stern DF. The biology of erbB-2/neu/HER-2 and its role in cancer. *Biochim Biophys Acta* 1994;1198:165-184.
  - 20 Costa MJ, Walls J. Epidermal growth factor receptor and c-erbB-2 oncoprotein expression in female genital tract carcinosarcomas (malignant mixed mullerian tumors). Clinicopathologic study of 82 cases. *Cancer* 1996;77:533-542.
  - 21 Yan M, Parker BA, Schwab R, Kurzrock R. HER2 aberrations in cancer: Implications for therapy. *Cancer Treat Rev* 2014;40:770-780.
  - 22 Liang JW, Zhang JJ, Zhang T, Zheng ZC. Clinicopathological and prognostic significance of HER2 overexpression in gastric cancer: A meta-analysis of the literature, 2014, pp 1-10.
  - 23 Bang YJ, Van Cutsem E, Feyereislova A, Chung HC, Shen L, Sawaki A, Lordick F, Ohtsu A, Omuro Y, Satoh T, Aprile G, Kulikov E, Hill J, et al. Trastuzumab in combination with chemotherapy versus chemotherapy alone for treatment of HER2-positive advanced gastric or gastro-oesophageal junction cancer (ToGA): A phase 3, open-label, randomised controlled trial. *Lancet* 2010;376:687-697.
  - 24 Comprehensive molecular characterization of gastric adenocarcinoma. *Nature* 2014;513:202-209.
  - 25 Lee HS, Chang MS, Yang HK, Lee BL, Kim WH. Epstein-barr virus-positive gastric carcinoma has a distinct protein expression profile in comparison with epstein-barr virus-negative carcinoma. *Clin Cancer Res* 2004;10:1698-1705.
  - 26 Sukawa Y, Yamamoto H, Noshio K, Kunimoto H, Suzuki H, Adachi Y, Nakazawa M, Nobuoka T, Kawayama M, Mikami M, Matsuno T, Hasegawa T, Hirata K, et al. Alterations in the human epidermal growth factor receptor 2-phosphatidylinositol 3-kinase-v-Akt pathway in gastric cancer. *World J Gastroenterol* 2012;18:6577-6586.
  - 27 Lee HE, Park KU, Yoo SB, Nam SK, Park DJ, Kim H, Lee HS. Clinical significance of intratumoral HER2 heterogeneity in gastric cancer. *Eur J Cancer* 2013;49:1448-1457.
  - 28 Fujii T, Kawahara A, Basaki Y, Hattori S, Nakashima K, Nakano K, Shirouzu K, Kohno K, Yanagawa T, Yamana H, Nishio K, Ono M, Kuwano M, et al. Expression of HER2 and estrogen receptor alpha depends upon nuclear localization of Y-box binding protein-1 in human breast cancers. *Cancer Res* 2008;68:1504-1512.
  - 29 Kalra J, Sutherland BW, Stratford AL, Dragowska W, Gelmon KA, Dedhar S, Dunn SE, Bally MB. Suppression of Her2/neu expression through ILK inhibition is regulated by a pathway involving TWIST and YB-1. *Oncogene* 2010;29:6343-6356.
  - 30 Shiota M, Izumi H, Onitsuka T, Miyamoto N, Kashiwagi E, Kidani A, Yokomizo A, Naito S, Kohno K. Twist promotes tumor cell growth through YB-1 expression. *Cancer Res* 2008;68:98-105.
  - 31 Wu J, Lee C, Yokom D, Jiang H, Cheang MC, Yorida E, Turbin D, Berquin IM, Mertens PR, Iftner T, Gilks CB, Dunn SE. Disruption of the Y-box binding protein-1 results in suppression of the epidermal growth factor receptor and HER-2. *Cancer Res* 2006;66:4872-4879.
  - 32 Bar-Sela G, Kuten A, Ben-Eliezer S, Gov-Ari E, Ben-Izhak O. Expression of HER2 and C-KIT in nasopharyngeal carcinoma: Implications for a new therapeutic approach. *Mod Pathol* 2003;16:1035-1040.
  - 33 Chuang T, Way T, Lin Y, Lee Y, Law S, Kao M. The Epstein-Barr virus nuclear antigen-1 may act as a transforming suppressor of the HER2/neu oncogene. *Febs Lett* 2002;532:135-142.
  - 34 Liu JY, Chuang TC, Way TD, Tsai TC, Hu CL, Liu GY, Wang SS, Chung JG, Kao MC. The N-terminal domain of EBNA1 acts as a suppressor of the HER2/neu oncogene. *Cancer Lett* 2009;273:273-280.
  - 35 Shiota M, Izumi H, Tanimoto A, Takahashi M, Miyamoto N, Kashiwagi E, Kidani A, Hirano G, Masubuchi D, Fukunaka Y, Yasuniwa Y, Naito S, Nishizawa S, et al. Programmed cell death protein 4 down-regulates Y-box binding protein-1 expression via a direct interaction with Twist1 to suppress cancer cell growth. *Cancer Res* 2009;69:3148-3156.
  - 36 Shiota M, Yokomizo A, Itsumi M, Uchiumi T, Tada Y, Song Y, Kashiwagi E, Masubuchi D, Naito S. Twist1 and Y-box-binding protein-1 promote malignant potential in bladder cancer cells. *Bju Int* 2011;108:E142-E149.
  - 37 Li QQ, Xu JD, Wang WJ, Cao XX, Chen Q, Tang F, Chen ZQ, Liu XP, Xu ZD. Twist1-mediated adriamycin-induced epithelial-mesenchymal transition relates to multidrug resistance and invasive potential in breast cancer cells. *Clin Cancer Res* 2009;15:2657-2665.
  - 38 Qin Q, Xu Y, He T, Qin C, Xu J. Normal and disease-related biological functions of Twist1 and underlying molecular mechanisms. *Cell Res* 2012;22:90-106.
  - 39 Sakura H, Maekawa T, Imamoto F, Yasuda K, Ishii S. Two human genes isolated by a novel method encode DNA-binding proteins containing a common region of homology. *Gene* 1988;73:499-507.
  - 40 Shibata T, Kan H, Murakami Y, Ureshino H, Watari K, Kawahara A, Kage M, Hattori S, Ono M, Kuwano M. Y-box binding protein-1 contributes to both HER2/ErbB2 expression and lapatinib sensitivity in human gastric cancer cells. *Mol Cancer Ther* 2013;12:737-746.
  - 41 Chernov KG, Barbet A, Hamon L, Ovchinnikov LP, Curmi PA, Pastre D. Role of microtubules in stress granule

- assembly: Microtubule dynamical instability favors the formation of micrometric stress granules in cells. *J Biol Chem* 2009;284:36569-36580.
- 42 Chernov KG, Mechulam A, Popova NV, Pastre D, Nadezhkina ES, Skabkina OV, Shanina NA, Vasiliev VD, Tarrade A, Melki J, Joshi V, Bacconnais S, Toma F, et al. YB-1 promotes microtubule assembly in vitro through interaction with tubulin and microtubules. *BMC Biochem* 2008;9:23.
  - 43 Kedersha N, Anderson P. Mammalian stress granules and processing bodies. *Methods Enzymol* 2007;431:61-81.
  - 44 Mao Y, Zhang DW, Zhu H, Lin H, Xiong L, Cao Q, Liu Y, Li QD, Xu JR, Xu LF, Chen RJ. LMP1 and LMP2A are potential prognostic markers of extranodal NK/T-cell lymphoma, nasal type (ENKTL). *Diagn Pathol* 2012;7:178.
  - 45 Deng JY, Liang H. Clinical significance of lymph node metastasis in gastric cancer. *World J Gastroenterol* 2014;20:3967-3975.
  - 46 LAUREN P. The two histological main types of gastric carcinoma: Diffuse and so-called intestinal-type carcinoma. An attempt at a histo-clinical classification. *Acta Pathol Microbiol Scand* 1965;64:31-49.
  - 47 Washington K. 7Th edition of the AJCC cancer staging manual: Stomach. *Ann Surg Oncol* 2010;17:3077-3079.
  - 48 Lourenco HM, Pereira TP, Fonseca RR, Cardoso PM. HER2/neu detection by immunohistochemistry: Optimization of in-house protocols. *Appl Immunohistochem Mol Morphol* 2009;17:151-157.
  - 49 Kong QL, Hu LJ, Cao JY, Huang YJ, Xu LH, Liang Y, Xiong D, Guan S, Guo BH, Mai HQ, Chen QY, Zhang X, Li MZ, et al. Epstein-Barr virus-encoded LMP2A induces an epithelial-mesenchymal transition and increases the number of side population stem-like cancer cells in nasopharyngeal carcinoma. *PLoS Pathog* 2010;6:e1000940.
  - 50 Guasparri I, Bubman D, Cesarman E. EBV LMP2A affects LMP1-mediated NF-kappaB signaling and survival of lymphoma cells by regulating TRAF2 expression. *Blood* 2008;111:3813-3820.
