# Supplementary material for: Epstein-Barr virus latent membrane protein 2A suppresses the expression of HER2 via a pathway involving TWIST and YB-1 in Epstein-Barr virus-associated gastric carcinomas
Source: PubMed Central journal article supplement (PMC4381589; doi:10.18632/oncotarget.2702), 2014-11-06
Supplement: oncotarget-06-207-s001.pdf [file oncotarget-06-207-s001.pdf]

# Epstein-Barr virus latent membrane protein 2A suppresses the expression of HER2 via a pathway involving TWIST and YB-1 in Epstein-Barr virus-associated gastric carcinomas

## Supplementary Material

**Supplementary Table S1: List of primers used in the present study.**

| Primers*              | Sequence (5' to 3')       |
|-----------------------|---------------------------|
| <b>HER2</b>           |                           |
| Sense                 | GCCTGTGCCCACTATAAGGAC     |
| Antisense             | GCAGCTTCCGCATCGTGTA       |
| <b>LMP2A</b>          |                           |
| Sense                 | ACGATGGCGGAAACAACCTC      |
| Antisense             | GGGTCCTCATAAGGCGGTG       |
| <b>RT-siRNA-LMP2A</b> |                           |
| Sense                 | GAATTCTGCAGCTATGGGGTCCCTA |
| Antisense             | AGATCTGCGATCTGGTGGGCATTC  |
| <b>YB-1</b>           |                           |
| Sense                 | CGCAGTGTAGGAGATGGAGAG     |
| Antisense             | GAACACCACCAGGACCTGTAA     |
| <b>TWIST</b>          |                           |
| Sense                 | GGAGTCCGCAGTCTTACGAG      |
| Antisense             | CCAGCTTGAGGGTCTGAATC      |
| <b>GAPDH</b>          |                           |
| Sense                 | CCACCATGGAGAAGGCTGGGGCTCA |
| Antisense             | ATCACGCCACAGTTTCCCGGAGGGG |

\*The amplification protocol for these five regions was one cycle at 94°C for 5 min, followed by 40 cycles of denaturation at 94°C for 1 min, annealing at 57°C for 1 min and elongation at 72°C for 90 sec, and a final extension at 72°C for 10 min.
